# Supplementary material
Source: PubMed Central journal article supplement (PMC3071354)
Supplement: supp_djr044_JNCI-10-1069-s01.pdf [file supp_djr044_JNCI-10-1069-s01.pdf]

SUPPLEMENTARY TABLE 1. Age and age-standardized characteristics according to rotating shift work status in 1988 among 68 336 women in the Nurses' Health Study\*

| Characteristics                                              | Years worked on rotating night shifts |                   |                   |                 |                 |
|--------------------------------------------------------------|---------------------------------------|-------------------|-------------------|-----------------|-----------------|
|                                                              | Never<br>(n=27 693)                   | 1-2<br>(n=16 464) | 3-5<br>(n=11 408) | 6-9<br>(n=4658) | ≥10<br>(n=8113) |
| Age, y, mean (SD)                                            | 54.1 (7.2)                            | 53.7 (7.0)        | 55.2 (7.1)        | 55.1 (7.1)      | 56.3 (7.0)      |
| BMI, kg/m <sup>2</sup> , mean (SD)                           | 25.4 (4.8)                            | 25.3 (4.7)        | 25.8 (5.0)        | 26.2 (5.3)      | 26.7 (5.5)      |
| Red or blond hair, %                                         | 15.4                                  | 15.3              | 16.0              | 15.1            | 15.3            |
| Current smoker, %                                            | 17.6                                  | 17.0              | 18.8              | 22.0            | 24.6            |
| History of adolescent sunburn reaction, %                    | 34.9                                  | 35.6              | 38.3              | 39.3            | 37.5            |
| ≥1 severe sunburns, %                                        | 88.0                                  | 89.6              | 90.3              | 89.9            | 87.9            |
| ≥1 moles on arms, %                                          | 35.7                                  | 37.8              | 38.4              | 37.4            | 37.5            |
| Family history of melanoma, %                                | 2.5                                   | 2.8               | 2.7               | 3.1             | 3.2             |
| College/high school, sun exposure ≥ 11 hrs/week in summer, % | 13.2                                  | 14.0              | 15.5              | 14.9            | 16.6            |
| Age 25-35, sun exposure ≥ 11 hrs/week in summer, %           | 12.5                                  | 13.1              | 13.9              | 13.9            | 14.2            |
| Age 36-59 years, sun exposure ≥ 11 hrs/week in summer, %     | 9.4                                   | 9.7               | 10.4              | 10.4            | 10.8            |
| Age ≥60, sun exposure ≥ 11 hrs/week in summer, %             | 7.5                                   | 8.0               | 7.8               | 8.5             | 8.6             |
| Birth, high UV residence, %                                  | 10.6                                  | 10.1              | 9.1               | 9.8             | 9.0             |
| Age 15 years, high UV residence, %                           | 10.9                                  | 9.9               | 9.1               | 9.5             | 8.6             |
| Age 30 years, high UV residence, %                           | 14.6                                  | 14.3              | 13.8              | 13.8            | 11.5            |

\* Age-standardized according to one-year increments in age. 103 613 of the women returned the 1988 questionnaire, which included the question about night work. The population for this study consisted of the 85 197 (82.2 percent) of the respondents who answered the question on night work. Women who did not answer the shift work question on the 1988 questionnaire did not substantially differ from respondents in terms of their risk profile. 10 799 incident cases of skin cancer were documented during 18 years of follow-up, comprising 9 632 basal-cell carcinoma (BCC), 849 squamous-cell carcinoma (SCC), and 318 melanoma case patients. We excluded women who reported having melanoma, SCC, BCC, or any other cancer before 1988. We also restricted the analysis to non-Hispanic white women because the number of case subjects in the other racial/ethnic categories was small. A total of 68 336 women remained to form the baseline population for this analysis, and 1 013 497 person years of follow-up were accrued from 1988 to 2006. SD = standard deviation; BMI = body mass index.
